# Supplementary material for: Enhanced Ammonia Gas Adsorption through Site-Selective Fluorination of Graphene
Source: MDPI journal article supplement (doi:10.3390/cryst12081117), 2022-08-10
Supplement: s1 [file s1]

# Enhanced Ammonia Gas Adsorption through Site-Selective Fluorination of Graphene

Tianbo Duan <sup>1</sup>, Hu Li <sup>1,2,3,\*</sup>, Lakshya Daukiya <sup>4,5</sup>, Laurent Simon <sup>4</sup> and Klaus Leifer <sup>1,\*</sup>

<sup>1</sup> Department of Engineering Sciences, Ångström Laboratory, Uppsala University, 75121 Uppsala, Sweden

<sup>2</sup> Shandong Technology Centre of Nanodevices and Integration, School of Microelectronics, Shandong University, Jinan 250101, China

<sup>3</sup> Shenzhen Research Institute, Shandong University, Shenzhen 518057, China

<sup>4</sup> Institut de Sciences des Matériaux de Mulhouse, CNRS-UMR 7361, 68093 Mulhouse, France

<sup>5</sup> Department of Physics, Indian Institute of Technology Jodhpur, Jodhpur 342037, India

\* Correspondence: hu.li@sdu.edu.cn (H.L.); klaus.leifer@angstrom.uu.se (K.L.)

## Electronic supplementary information

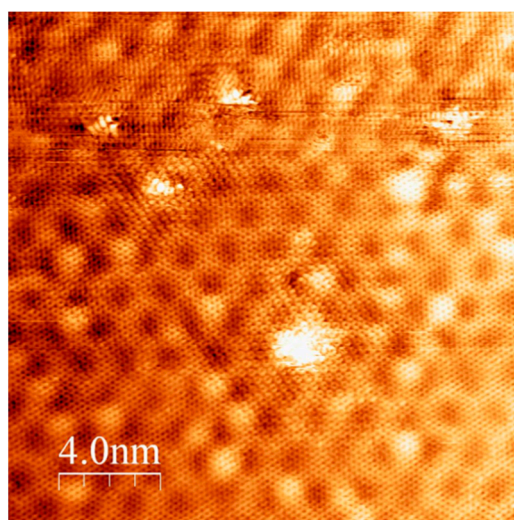

**Figure S1.** Large area scanning tunneling microscopy image of fluorinated graphene.

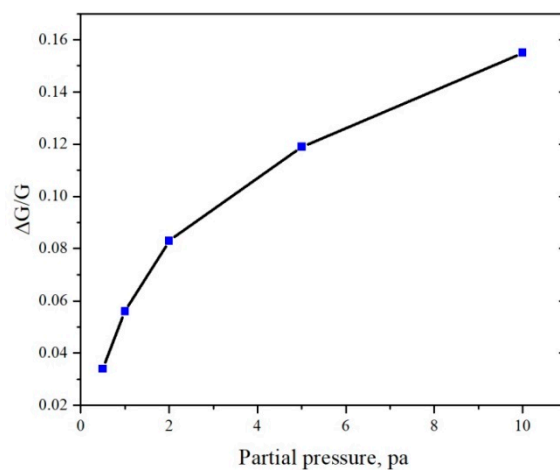

**Figure S2.** Response of fluorinated graphene to  $\text{NH}_3$  as a function of partial pressure.

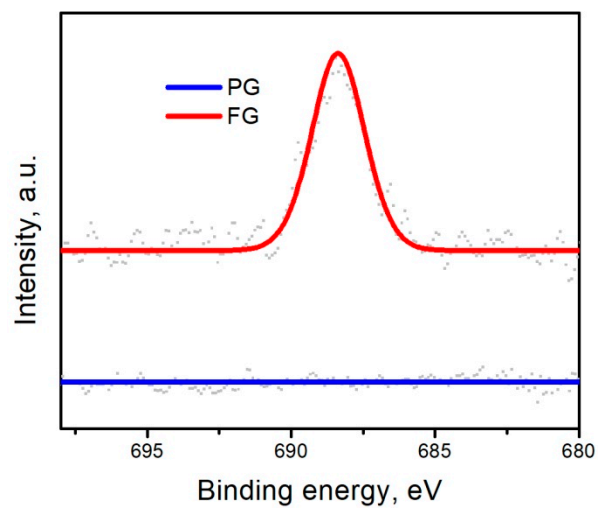

**Figure S3.** F1s XPS spectrum of pristine and fluorinated graphene.
