# Supplementary material for: Enhanced Ammonia Gas Adsorption through Site-Selective Fluorination of Graphene
Source: MDPI journal article supplement (doi:10.3390/cryst12081117), 2022-08-10
Supplement: s1 [file s1]

Archive with 1 entries (1 files):
- crystals-1844281-supplementary.pdf
